# Supplementary material
Source: publisher site journal article supplement (https://www.dovepress.com/article/517371)
Supplement: Supplementary file 1 [file 517371%20Supplementary%20Tables%201-3.docx]

| **Exposure** | **Outcome** | **Method** | **Beta** | **Se** | **P** |
| --- | --- | --- | --- | --- | --- |
| PE | T2DM | MR Egger | 0.050 | 0.956 | 0.96 |
| PE | T2DM | Weighted median | 0.018 | 0.059 | 0.76 |
| PE | T2DM | Inverse variance weighted | 0.020 | 0.056 | 0.72 |
| PE | T2DM | Contamination mixture method | 0.019 | 0.306 | 0.72 |
| PE | T2DM | Robust Adjusted Profile Score method | 0.020 | 0.057 | 0.73 |

**Supplemental table 1** **Mendelian randomization analysis of the causal relationship between PE and T2DM**

PE, Preeclampsia; T2DM, Type 2 diabetes mellitus

**Supplemental table 2 Heterogeneity test of PE and T2DM**

| **Exposure** | **Outcome** | **Method** | **Q** | **Q_df** | **Q_pval** |
| --- | --- | --- | --- | --- | --- |
| PE | T2DM | IVW | 0.077 | 2 | 0.962 |

PE, Preeclampsia; T2DM, Type 2 diabetes mellitus; IVW, Inverse variance weighted.

**Supplemental table 3 Horizontal pleiotropy test of PE and T2DM**

| **Exposure** | **Outcome** | **Egger_intercept** | **Se** | **P value** |
| --- | --- | --- | --- | --- |
| PE | T2DM | -3.44E-03 | 0.108 | 0.98 |

PE, Preeclampsia; T2DM; Type 2 diabetes mellitus.
